# Supplementary material for: RAFT copolymerization of acid chloride-containing monomers
Source: Royal Society of Chemistry journal article supplement (doi:10.1039/c3py00867c), 2013-08-27
Supplement: c3py00867c.pdf [file c3py00867c.pdf]

## **Supporting Information**

### **RAFT Copolymerization of Acid Chloride-Containing Monomers**

Myungeun Seo and Marc A. Hillmyer\*

Department of Chemistry, University of Minnesota, Minneapolis, Minnesota 55455

\*To whom should be addressed: [hillmyer@umn.edu](mailto:hillmyer@umn.edu)

This Supporting Information includes:

Figure S1 – S6

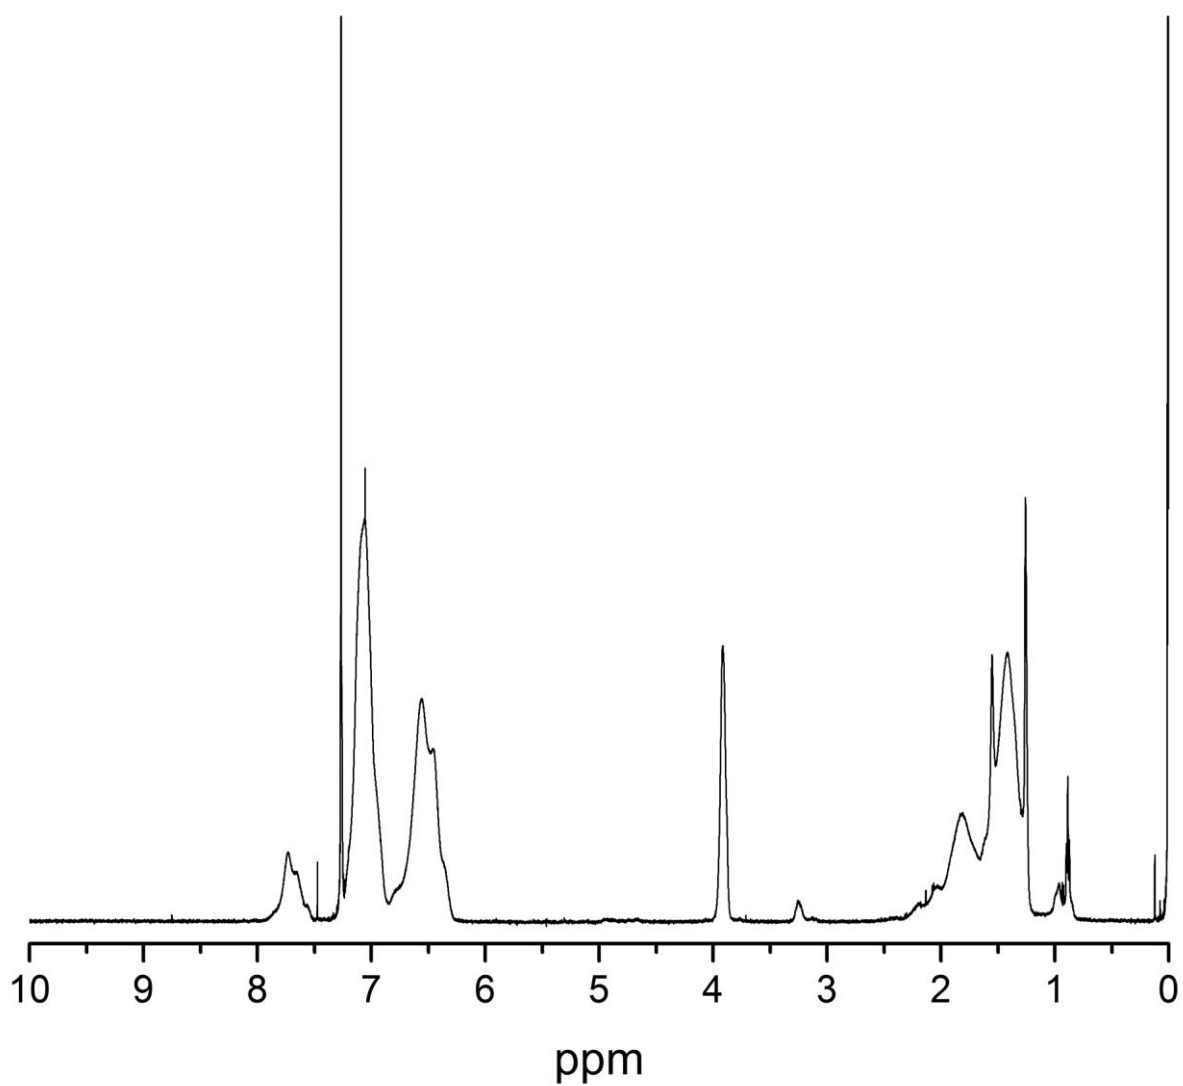

Figure S1.  $^1\text{H}$  NMR spectrum of P(S-*co*-VBC) reacted with methanol (entry 1 in Table 3).

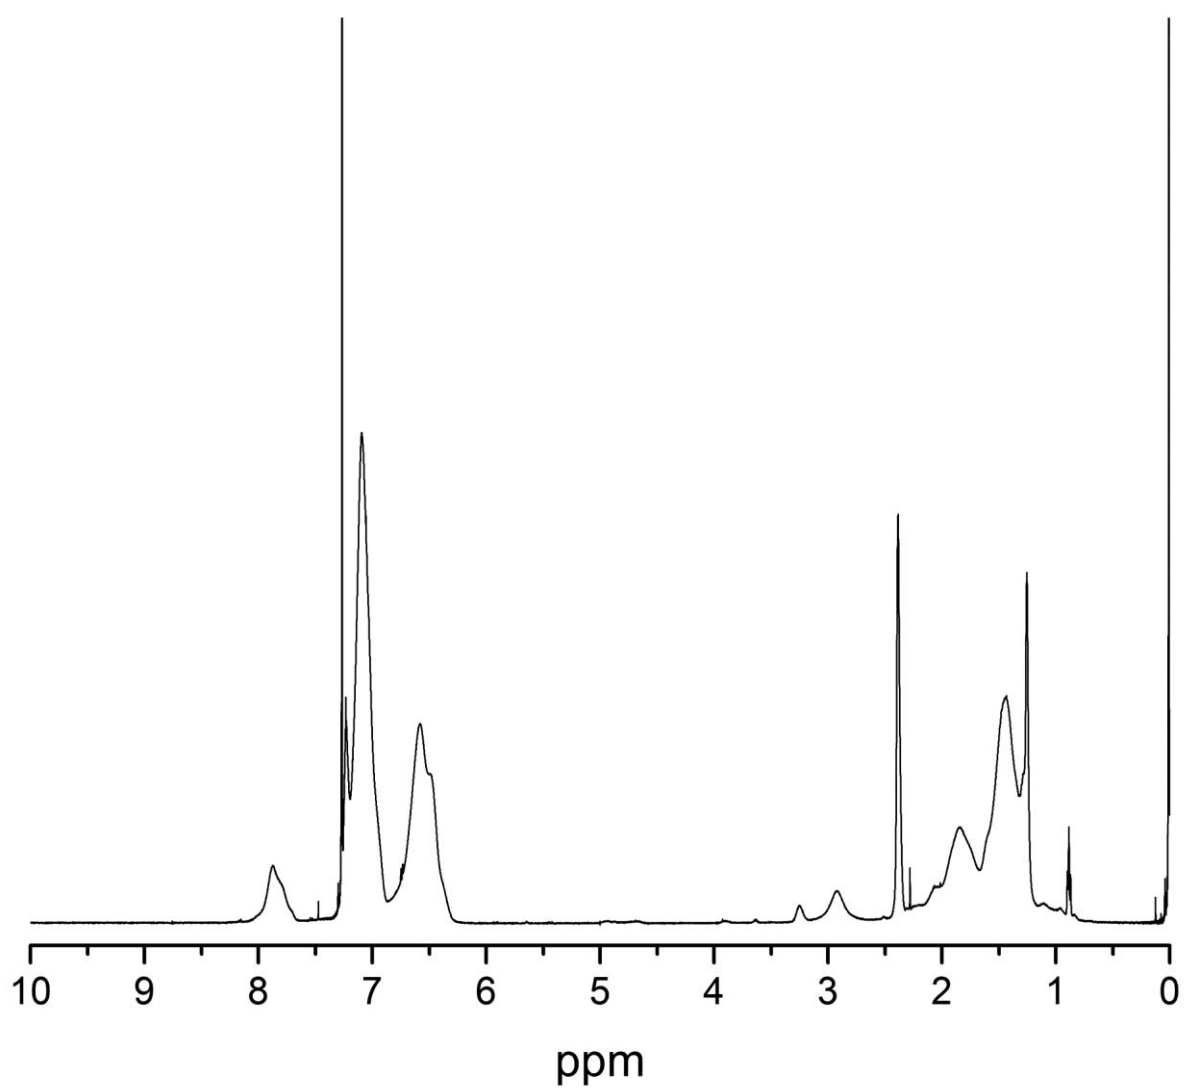

Figure S2.  $^1\text{H}$  NMR spectrum of P(S-*co*-VBC) reacted with *p*-cresol (entry 2 in Table 3).

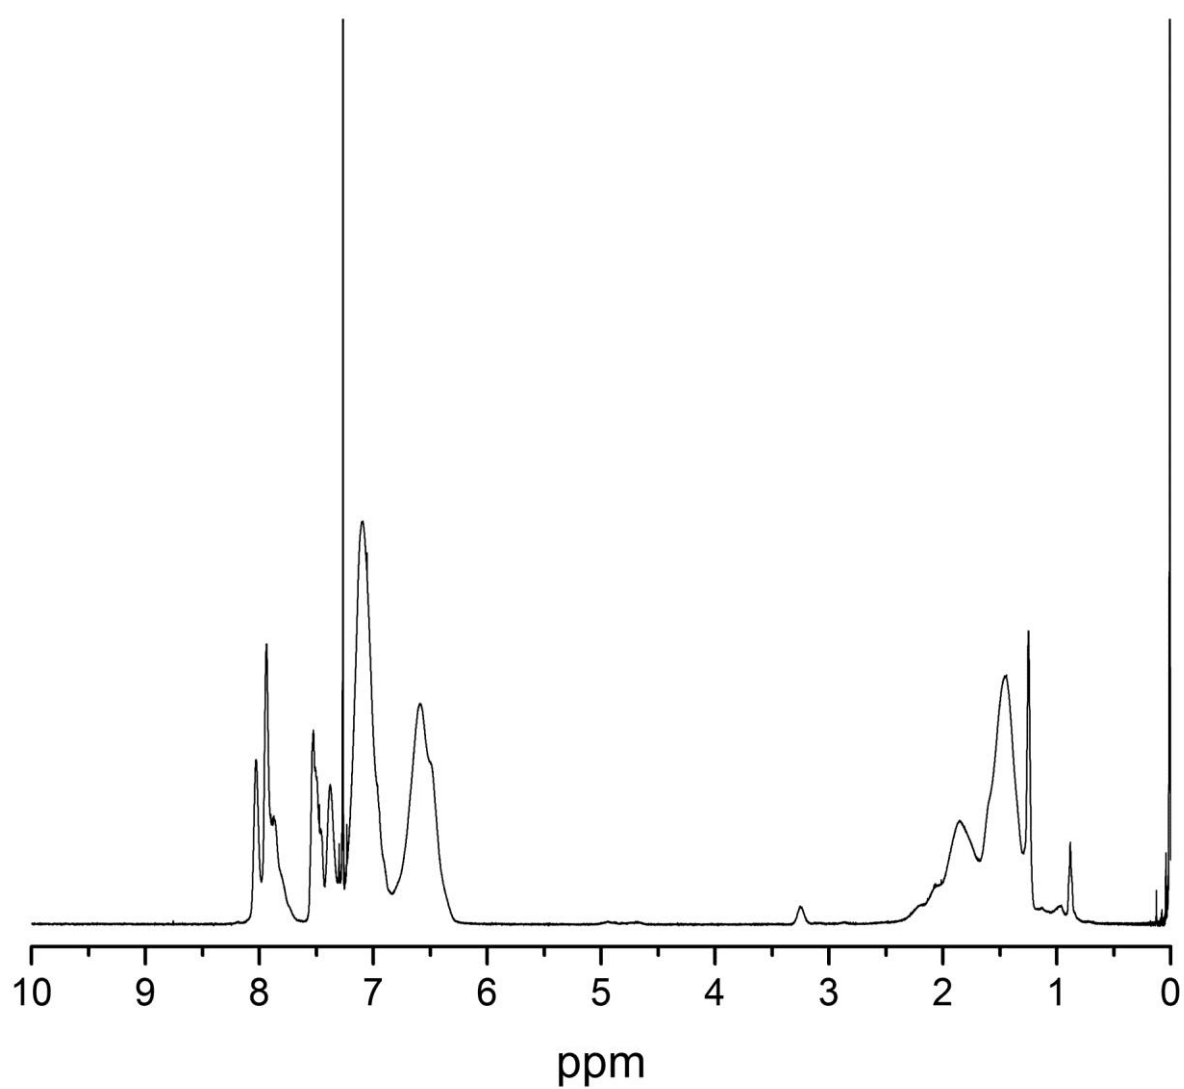

Figure S3.  $^1\text{H}$  NMR spectrum of P(S-*co*-VBC) reacted with 4-phenylazophenol (entry 3 in Table 3).

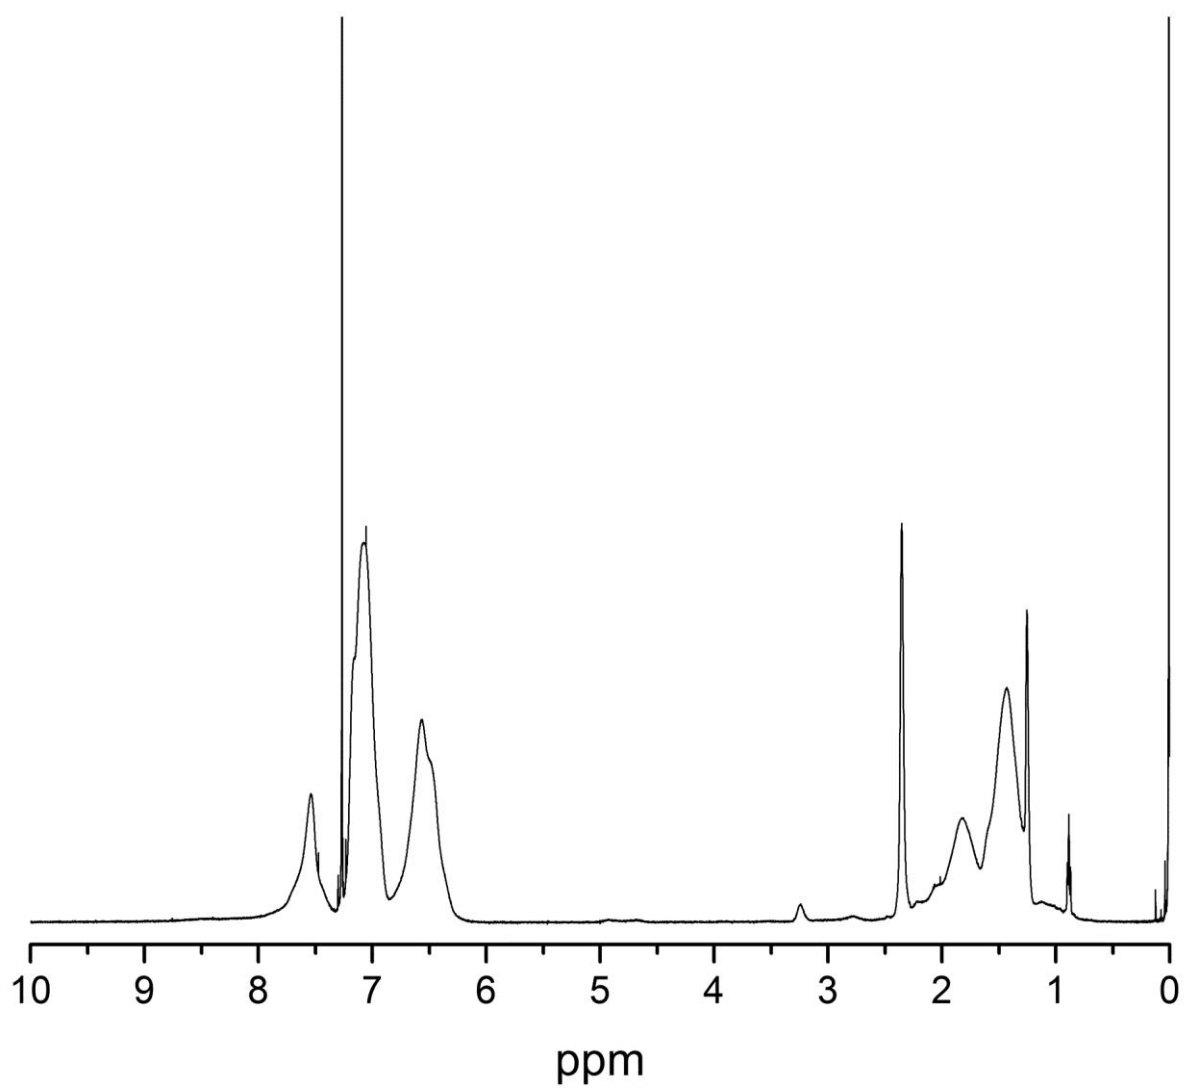

Figure S4.  $^1\text{H}$  NMR spectrum of P(S-*co*-VBC) reacted with *p*-toluidine (entry 4 in Table 3).

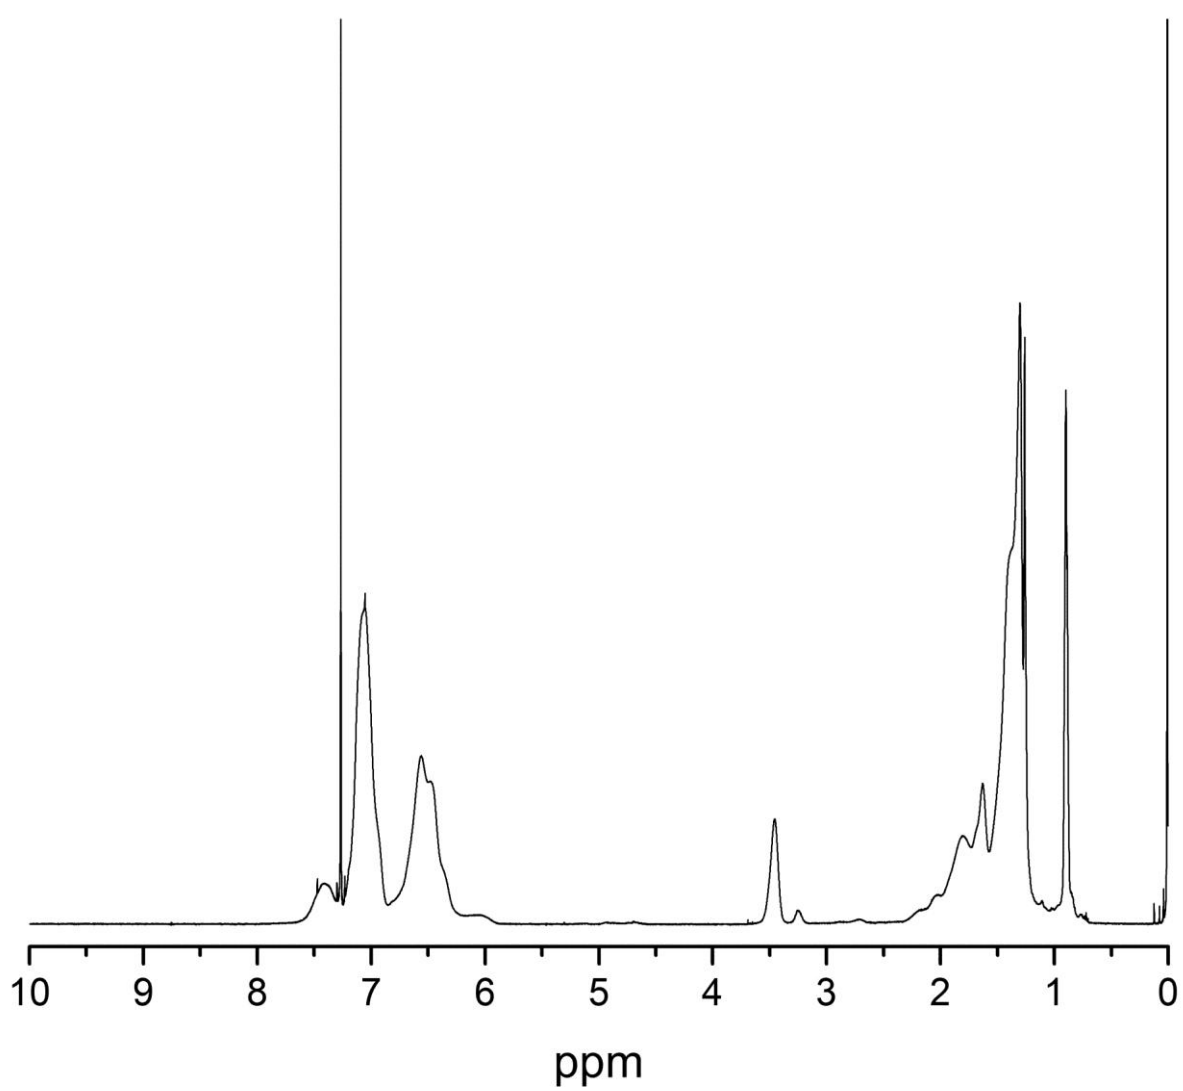

Figure S5.  $^1\text{H}$  NMR spectrum of P(S-*co*-VBC) reacted with octylamine (entry 5 in Table 3).

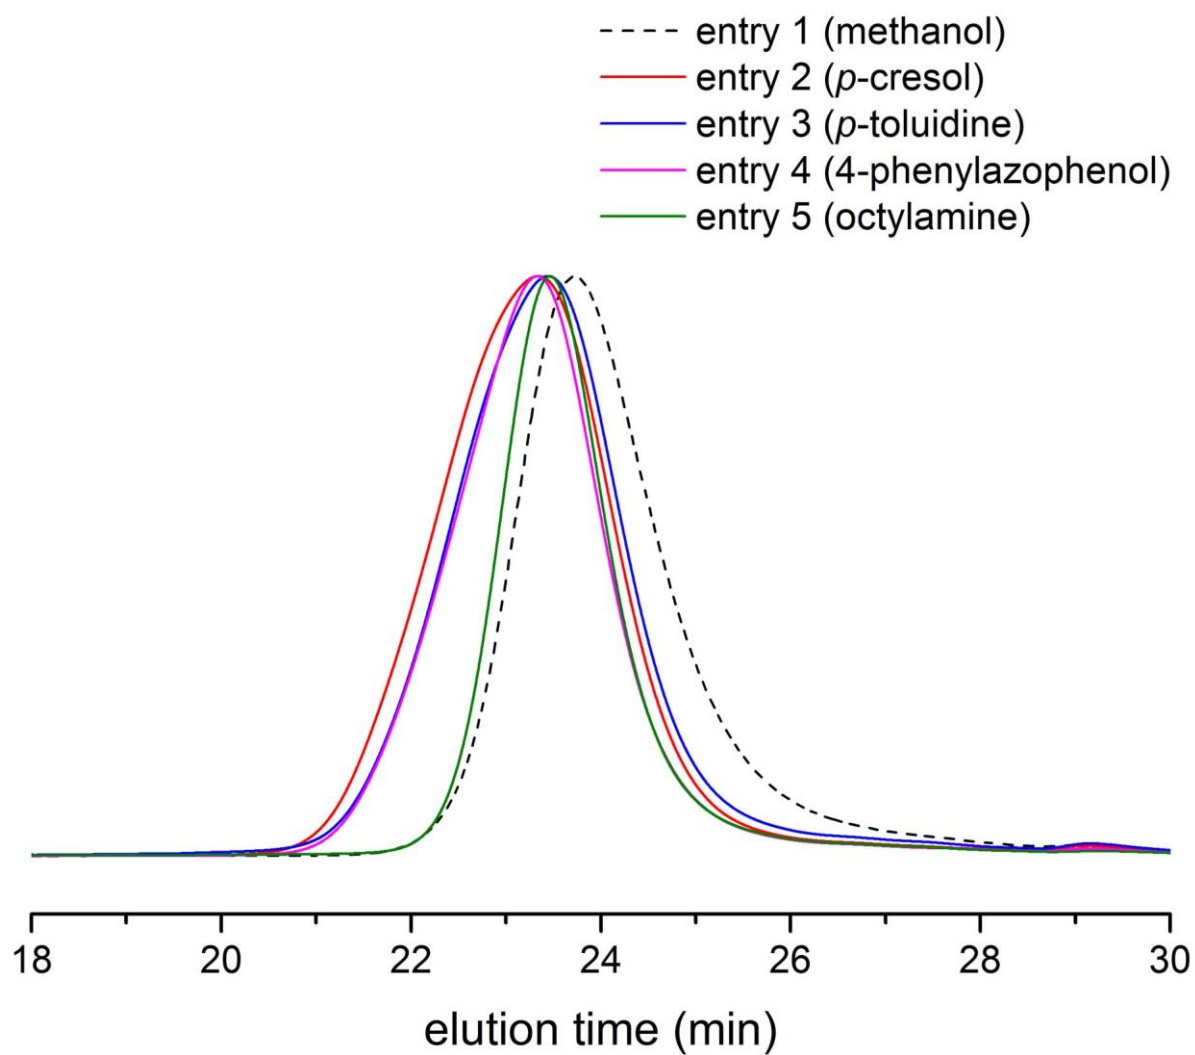

Figure S6. SEC Traces of the functional polymers synthesized by postpolymerization modification of P(S-*co*-VBC).
